# Supplementary material
Source: PubMed Central journal article supplement (PMC6837884)
Supplement: EMS84378-supplement-1.pdf [file EMS84378-supplement-1.pdf]

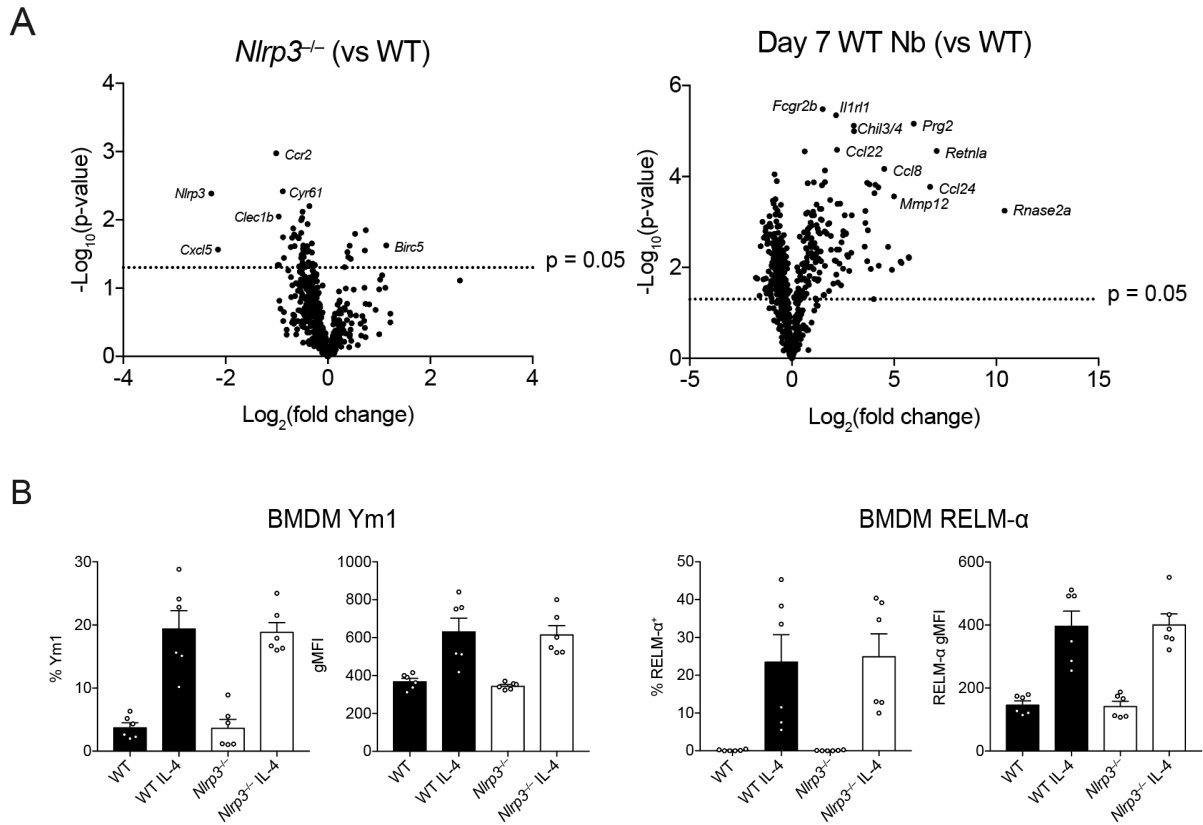

**Supplemental Figure 1 (A)** Differential gene expression in naïve *Nlrp3*<sup>-/-</sup> mice and most upregulated genes during *N. brasiliensis* infection. (Left) whole lung RNA was analysed by NanoString and volcano plots were generated to assess differential gene expression in naïve *Nlrp3*<sup>-/-</sup> mice compared to naïve WT mice. (Right) differential gene expression in WT mice infected with *N. brasiliensis* on day 7 post-infection compared to WT naïve mice. Data were from a single Nanostring run (n=2-4 per group). **(B)** IL-4 stimulation of BMDM cultures. BMDMs were generated from WT and *Nlrp3*<sup>-/-</sup> mice and stimulated for 24 hours with IL-4. Frequencies and gMFI are shown for Ym1 and RELM-α for CD11b<sup>+</sup> BMDMs analysed by flow cytometry. Data are pooled from 2 independent experiments (mean ± s.e.m.) from 2 individual experiments with 3-4 mice per group (per experiment).
